# Supplementary material for: Association between IL-4 and IL-4R Polymorphisms and Periodontitis: A Meta-Analysis
Source: Hindawi journal article supplement (doi:10.1155/2017/8021279), 2017-01-01
Supplement: f1 [file 8021279.f1.pdf]

Supplementary table 1: Sensitivity analysis with Random effects model

| Genetic Model           | Meta-analysis               | tau <sup>2</sup> | I <sup>2</sup> % | OR   | 95%-CI       | p-value |
|-------------------------|-----------------------------|------------------|------------------|------|--------------|---------|
| <b>IL-4-590C/T</b>      |                             |                  |                  |      |              |         |
| TT vs. CC               | Omitting Loo 2012 [22]      | 0.17             | 26.4             | 1.28 | [0.83-1.97]  | 0.26    |
|                         | Overall pooled analysis     | 2.40             | 85.2             | 1.52 | [0.83-3.59]  | 0.34    |
| TT vs. (CC+CT)          | Omitting Loo 2012 [22]      | 0.09             | 25.7             | 1.14 | [0.83-1.57]  | 0.42    |
|                         | Overall pooled analysis     | 0.95             | 84.9             | 1.30 | [0.83-2.31]  | 0.38    |
| <b>IL-4-33C/T</b>       |                             |                  |                  |      |              |         |
| CT vs. CC               | Omitting Holla 2008 [17]    | 0.00             | 0                | 0.74 | [0.55-0.99]  | 0.05    |
|                         | Overall pooled analysis     | 0.05             | 27.4             | 0.83 | [0.61-1.13]  | 0.24    |
| <b>IL-4 70bp repeat</b> |                             |                  |                  |      |              |         |
| 12 vs. 11               | Omitting Anovazzi 2010 [11] | 0.41             | 49.3             | 1.35 | [0.65-2.77]  | 0.42    |
|                         | Overall pooled analysis     | 0.92             | 76               | 1.00 | [0.43-2.31]  | 1.00    |
| <b>IL-4-1099T/G</b>     |                             |                  |                  |      |              |         |
| G vs. T                 | Omitting Chen 2013 [13]     | 0.00             | NA               | 0.40 | [0.27-0.60]  | <0.01   |
|                         | Omitting Chen 2016 [14]     | 0.00             | NA               | 1.58 | [1.16-2.15]  | <0.01   |
|                         | Overall pooled analysis     | 0.91             | 96.4             | 0.80 | [0.21-3.07]  | 0.74    |
| GG vs. TT               | Omitting Chen 2013 [13]     | 0.00             | NA               | 0.11 | [0.01-0.91]  | 0.04    |
|                         | Omitting Chen 2016 [14]     | 0.00             | NA               | 2.20 | [1.28-3.78]  | <0.01   |
|                         | Overall pooled analysis     | 4.06             | 86.7             | 0.58 | [0.04-11.46] | 0.72    |
| TG vs. TT               | Omitting Chen 2013 [13]     | 0.00             | NA               | 0.43 | [0.28-0.67]  | <0.01   |
|                         | Overall pooled analysis     | 0.12             | 65.7             | 0.57 | [0.32-1.04]  | 0.07    |
| (GG+TG) vs. TT          | Omitting Chen 2013 [13]     | 0.00             | NA               | 0.40 | [0.26-0.62]  | <0.01   |
|                         | Overall pooled analysis     | 0.66             | 93.7             | 0.73 | [0.23-2.33]  | 0.60    |
| GG vs. (TT+ TG)         | Omitting Chen 2016 [14]     | 0.00             | NA               | 2.26 | [1.32-3.88]  | <0.01   |
|                         | Overall pooled analysis     | 3.81             | 85.9             | 0.63 | [0.03-11.35] | 0.75    |
